# Supplementary material for: The Influence of pH on Subsurface Denitrification Stimulated with Emulsified Vegetable Oil
Source: MDPI journal article supplement (doi:10.3390/w15050883), 2023-02-24
Supplement: s1 [file s1]

## Supplementary Materials

# **The Influence of pH on Subsurface Denitrification Stimulated with Emulsified Vegetable Oil**

**Veronica L. Gonzalez <sup>1</sup>, Paul M. Dombrowski. <sup>1,2</sup>, Michael D. Lee <sup>3</sup>, and C. Andrew Ramsburg <sup>1\*</sup>**

<sup>1</sup> Department of Civil & Environmental Engineering, Tufts University Medford, MA 02155, USA;

<sup>2</sup> ISOTEC, Lawrenceville, NJ 08648, USA;

<sup>3</sup> Terra Systems, Inc., Claymont, DE 19703, USA.

\* Correspondence: [andrew.ramsburg@tufts.edu](mailto:andrew.ramsburg@tufts.edu), +1-617-627-4286

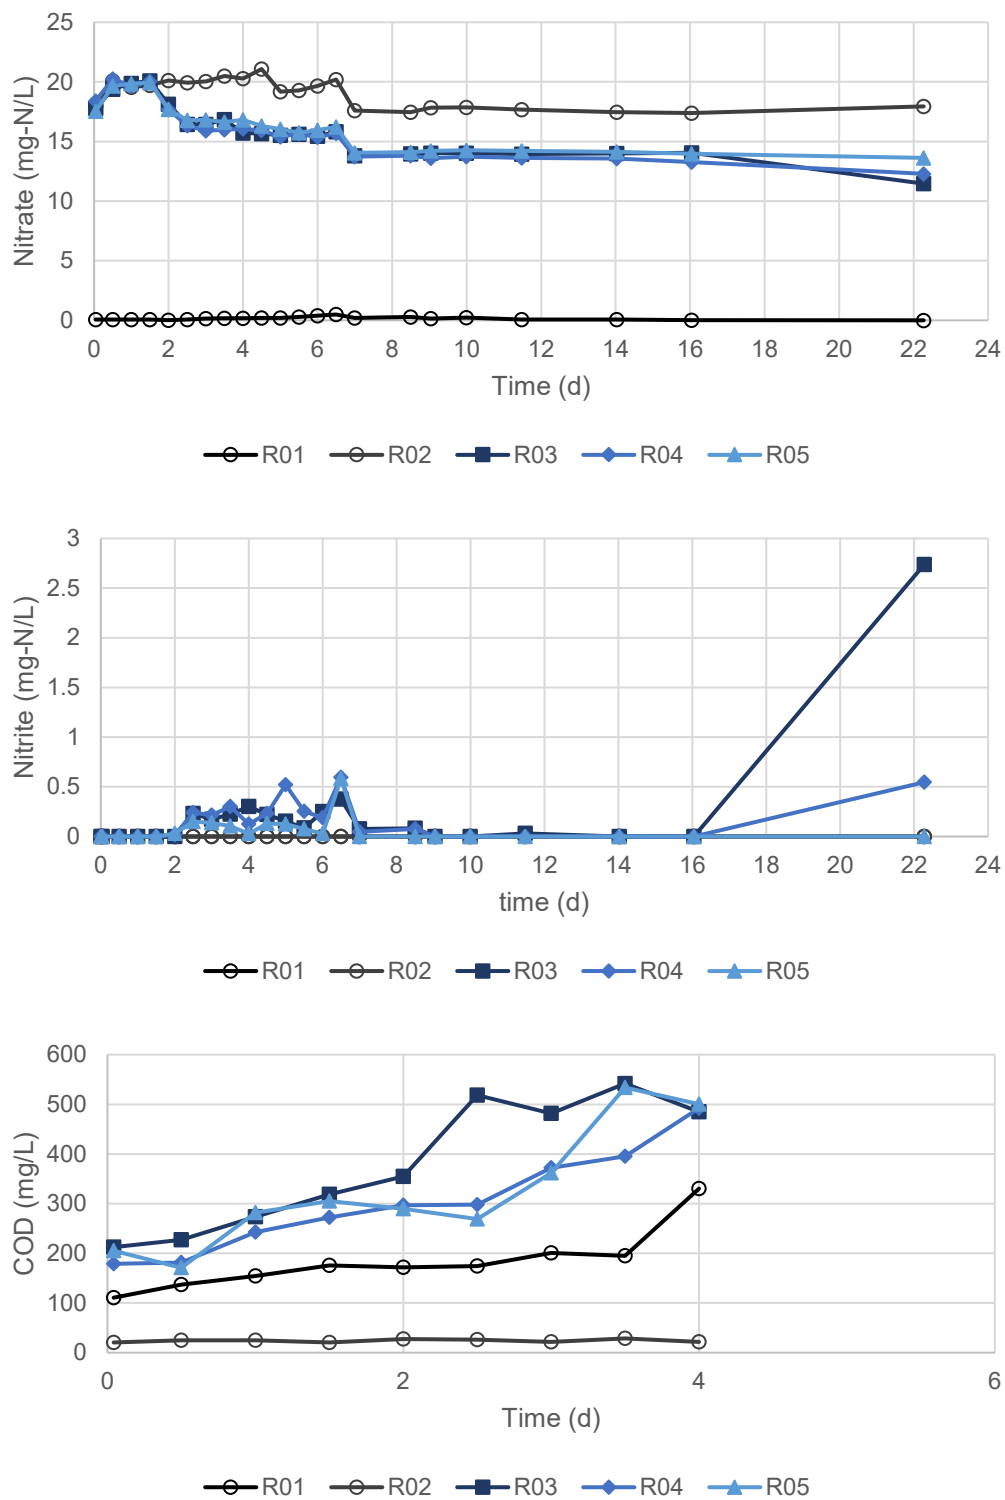

Figure S1. Experiment 1: (top) Nitrate; (middle) Nitrite; (bottom) COD. R01- control with no nitrate, R02- control with no EVO, R03, R04, R05- replicates of reactor with nitrate and EVO.

**Table S1.** Process rate equations used in the model.

| #  | Process                                                           | Process rate equation                                                                                                                                                                                                                                                         |
|----|-------------------------------------------------------------------|-------------------------------------------------------------------------------------------------------------------------------------------------------------------------------------------------------------------------------------------------------------------------------|
| 1  | Hydrolysis                                                        | $k_H \frac{X_S/X_H}{K_X + X_S/X_H} X_H$                                                                                                                                                                                                                                       |
| 2  | Aerobic Storage of S <sub>s</sub>                                 | $k_{sto} \frac{S_O}{K_{H,O_2} + S_O} \frac{S_S}{K_{H,SS} + S_S} X_H$                                                                                                                                                                                                          |
| 3  | Anoxic Storage of S <sub>s</sub> NO <sub>3</sub> –NO <sub>2</sub> | $k_{sto} \eta_{H,NO_3} \frac{K_{H,O_2} inh}{K_{H,O_2} inh + S_O} \frac{S_S}{K_{H,SS} + S_S} \frac{S_{NO_3}}{K_{H,NO_3} + S_{NO_3}} X_H$                                                                                                                                       |
| 4  | Anoxic Storage of S <sub>s</sub> NO <sub>2</sub> –N <sub>2</sub>  | $k_{sto} \eta_{H,NO_2} \frac{K_{H,O_2} inh}{K_{H,O_2} inh + S_O} \frac{S_S}{K_{H,SS} + S_S} \frac{S_{NO_2}}{K_{H,NO_2} + S_{NO_2}} X_H$                                                                                                                                       |
| 5  | Aerobic Growth of X <sub>H</sub>                                  | $\mu_H \frac{S_O}{K_{H,O_2} + S_O} \frac{S_{NH}}{K_{H,NH_4} + S_{NH}} \frac{S_{ALK}}{K_{H,ALK} + S_{ALK}} \frac{X_{STO}/X_H}{K_{H,STO} + X_{STO}/X_H} X_H$                                                                                                                    |
| 6  | Anoxic Growth NO <sub>3</sub> –NO <sub>2</sub>                    | $\mu_H \eta_{H,NO_3} \frac{K_{H,O_2} inh}{K_{H,O_2} inh + S_O} \frac{K_{H,NO_2} inh}{K_{H,NO_2} inh + S_{NO_2}} \frac{S_{NH}}{K_{H,N_4} + S_{NH}} \frac{S_{ALK}}{K_{H,ALK} + S_{ALK}} \frac{X_{STO}/X_H}{K_{H,STO} + X_{STO}/X_H} \frac{S_{NO_3}}{K_{H,NO_3} + S_{NO_3}} X_H$ |
| 7  | Anoxic growth NO <sub>2</sub> –N <sub>2</sub>                     | $\mu_H \eta_{H,NO_2} \frac{K_{H,O_2} inh}{K_{H,O_2} inh + S_O} \frac{K_{H,NO_2} inh}{K_{H,NO_2} inh + S_{NO_2}} \frac{S_{NH}}{K_{H,N_4} + S_{NH}} \frac{S_{ALK}}{K_{H,ALK} + S_{ALK}} \frac{X_{STO}/X_H}{K_{H,STO} + X_{STO}/X_H} \frac{S_{NO_2}}{K_{H,NO_2} + S_{NO_2}} X_H$ |
| 8  | Aerobic Endogenous Resp. of X <sub>H</sub>                        | $b_{H,O_2} \frac{S_O}{K_{H,O_2} + S_O} X_H$                                                                                                                                                                                                                                   |
| 9  | Anoxic Endogenous Resp. NO <sub>3</sub> –NO <sub>2</sub>          | $b_{H,O_2} \eta_{H,endNO_3} \frac{K_{H,O_2} inh}{K_{H,O_2} inh + S_O} \frac{S_{NO_3}}{K_{H,NO_3} + S_{NO_3}} X_H$                                                                                                                                                             |
| 10 | Anoxic Endogenous Resp. NO <sub>2</sub> –N <sub>2</sub>           | $b_{H,O_2} \eta_{H,endNO_2} \frac{K_{H,O_2} inh}{K_{H,O_2} inh + S_O} \frac{S_{NO_2}}{K_{H,NO_2} + S_{NO_2}} X_H$                                                                                                                                                             |
| 11 | Aerobic Resp. of X <sub>STO</sub>                                 | $b_{STO,O_2} \frac{S_O}{K_{H,O_2} + S_O} X_{STO}$                                                                                                                                                                                                                             |
| 12 | Anoxic Resp. of X <sub>STO</sub> NO <sub>3</sub> –NO <sub>2</sub> | $b_{STO,O_2} \eta_{H,endNO_3} \frac{K_{H,O_2} inh}{K_{H,O_2} inh + S_O} \frac{S_{NO_3}}{K_{H,NO_3} + S_{NO_3}} X_{STO}$                                                                                                                                                       |
| 13 | Anoxic Resp. of X <sub>STO</sub> NO <sub>2</sub> –N <sub>2</sub>  | $b_{STO,O_2} \eta_{H,endNO_2} \frac{K_{H,O_2} inh}{K_{H,O_2} inh + S_O} \frac{S_{NO_2}}{K_{H,NO_2} + S_{NO_2}} X_{STO}$                                                                                                                                                       |

**Table S2.** Model stoichiometry [38].

[illegible]

| #  | Process                                     | $S_{NO_3}$ | $S_{NO_2}$        | $S_{N_2}$        | $S_{NH}$ | $X_S$ | $S_S$ | $S_O$ | $S_{ALK}$         | $X_H$ | $X_{STO}$ | $X_I$ |
|----|---------------------------------------------|------------|-------------------|------------------|----------|-------|-------|-------|-------------------|-------|-----------|-------|
| 13 | Anoxic Resp. of<br>$X_{STO}$ $NO_2$ - $N_2$ | 0          | $-\frac{1}{1.72}$ | $\frac{1}{1.72}$ | 0        | 0     | 0     | 0     | $\frac{1}{24.08}$ | 0     | -1        | 0     |
